# Supplementary material
Source: publisher figshare collection journal article supplement (https://tandf.figshare.com/ndownloader/files/13247795)
Supplement: Supplementary file 1 [file 13247795]

Table S2. GenBank accession numbers for sequence data included in this study. GenBank accessions in bold type were newly determined for this study.

|  |  | **GenBank Accession***b* | | | |
| --- | --- | --- | --- | --- | --- |
| **Species** | **Voucher***a* | **COI-5P** | ***rbc*L-3P** | ***rbc*L** | **LSU** |
| *Acanthosiphonia echinata* (Harvey) Savoie & G.W.Saunders | GWS006229 | **HM916728** | ND | ND | ND |
| GWS006238 | **HM916729** | ND | **MF120866** | **MF120819** |
| GWS006239 | **HM916730** | ND | **MF120862** | ND |
|  | GWS006240 | **HM916731** | ND | ND | ND |
|  | GWS008071 | **MF120680** | ND | ND | ND |
|  | GWS012465 | **HQ919471** | ND | ND | ND |
|  | GWS027643 | **MF120699** | ND | ND | ND |
|  | GWS032162 | **MF120690** | ND | ND | ND |
|  | GWS032166 | **MF120667** | ND | ND | ND |
|  | GWS032170 | **MF120610** | ND | ND | ND |
|  | GWS032171 | ND | **MF120835** | ND | ND |
|  | GWS032172 | **MF120660** | ND | ND | ND |
|  | GWS032173 | **MF120744** | ND | ND | ND |
|  | GWS032174 | **MF120659** | ND | ND | ND |
|  | GWS032175 | ND | **MF120860** | ND | ND |
| *Amplisiphonia pacifica* Hollenberg | GWS014483 | KU564349 | ND | KU564470 | **MF120811** |
| *Carradoriella denudata* (Dillwyn) Savoie & G.W.Saunders | GenBank | ND | ND | JX828143 | ND |
| *Carradoriella elongata* (Hudson) Savoie & G.W.Saunders | GWS030132 | **MF120730** | ND | **MF120875** | **MF120823** |
| GWS031855 | **MF120746** | ND | ND | ND |
| GWS038061 | **MF409430** | ND | ND | ND |
|  | GWS038066 | **MF409425** | ND | ND | ND |
|  | GWS038866 | **MF120802** | ND | ND | ND |
|  | GWS040621 | **MF409416** | ND | ND | ND |
|  | GWS040774 | **MF409427** | ND | ND | ND |
|  | GWS040777 | **MF409419** | ND | ND | ND |
|  | GWS040834 | **MF409433** | ND | ND | ND |
|  | 2016_BIO309A_02 | **MF409415** | ND | ND | ND |
| *Carradoriella elongella* (Harvey) Savoie & G.W.Saunders | GenBank | ND | ND | AF342913 | ND |
| *Carradoriella virgata* (C.Agardh) P.C.Silva | GWS036360 | **MF120718** | ND | **MF120872** | ND |
| GWS036398 | **MF120623** | ND | ND | ND |
|  | GWS036401 | **MF120783** | ND | ND | ND |
| *Eutrichosiphonia confusa* (Hollenberg) Savoie & G.W.Saunders | GWS021926 | **KM254652** | ND | **MF120870** | ND |
| *Eutrichosiphonia sabulosia* (B.Kim & M.S.Kim) Savoie & G.W.Saunders | GenBank | ND | ND | KF479248 | ND |
| *Herposiphonia plumula* (J.Agardh) Falkenberg | GWS027411 | KU564428 | ND | KU564517 | **MF120830** |
| *Kapraunia amplacapilli* (B.Kim & M.S.Kim) Savoie & G.W.Saunders | GenBank | ND | ND | KF479251 | ND |
| *Kapraunia morroides* (B.Kim & M.S.Kim) Savoie & G.W.Saunders | GenBank | ND | ND | KF479254 | ND |
| *Kapraunia pentamera* (Hollenberg) Savoie & G.W.Saunders | GenBank | ND | ND | HM573563 | ND |
| *Kapraunia schneideri* (Stuercke & Freshwater) Savoie & G.W.Saunders | EC061 | **MF543366** | ND | ND | ND |
| GWS031240 | **MF120606** | ND | **MF120837** | ND |
| GWS031241 | **MF120708** | ND | **MF120863** | ND |
| GenBank | GU385828 | ND | EU492912 | ND |
| *Lampisiphonia iberica* Bárbara, Secilla, Díaz-Tapia & H.G.Choi | GenBank | ND | ND | JX828132 | ND |
| *Leptosiphonia brodiei* (Dillwyn) Savoie & G.W.Saunders | GenBank | ND | ND | AF342916 | ND |
| *Leptosiphonia fibrata* (Dillwyn) Savoie & G.W.Saunders | GenBank | ND | ND | AF342915 | ND |
| *Leptosiphonia fibrillosa* (Dillwyn) Savoie & G.W.Saunders | GWS038049 | **MF409429** | ND | ND | ND |
| GWS040833 | **MF409420** | ND | ND | ND |
|  | GWS040869 | **MF409422** | ND | ND | ND |
|  | GWS040913 | **MF409421** | ND | ND | ND |
|  | GWS040914 | **MF409418** | ND | ND | ND |
|  | 2016_BIO309A_18 | **MF409434** | ND | ND | ND |
| *Leptosiphonia* sp._1*fibrillosa* | GWS007061 | **MF120613** | ND | ND | ND |
| GWS007062 | **HQ919556** | ND | ND | ND |
|  | GWS007938 | **MF120742** | ND | ND | ND |
|  | GWS013808 | **HM916100** | ND | ND | ND |
|  | GWS013809 | **HM916101** | ND | **MF120902** | ND |
| *Leptosiphonia flexicaulis* (Harvey) Savoie & G.W.Saunders | GWS002290 | **MF120598** | ND | ND | ND |
| GWS002298 | **MF120617** | ND | ND | ND |
| GWS002689 | **HM918502** | ND | ND | ND |
|  | GWS007030 | **HM916860** | ND | ND | ND |
|  | GWS007101 | **HM916867** | ND | ND | ND |
|  | GWS007111 | **HM916869** | ND | **MF120856** | ND |
|  | GWS007268 | **HM916894** | ND | ND | ND |
|  | GWS007364 | **HM916904** | ND | ND | ND |
|  | GWS007393 | **HM916905** | ND | **MF120877** | **MF120824** |
|  | GWS007766 | **MF120629** | ND | ND | ND |
|  | GWS008829 | **HM918827** | ND | ND | ND |
|  | GWS008830 | **MF120681** | ND | ND | ND |
|  | GWS008831 | **HM918828** | ND | ND | ND |
|  | GWS008840 | **MF120705** | ND | ND | ND |
|  | GWS011609 | **MF120614** | ND | ND | ND |
|  | GWS011660 | **MF120790** | ND | ND | ND |
|  | GWS011862 | **HM916553** | ND | ND | ND |
|  | GWS013793 | **HM916368** | ND | ND | ND |
|  | GWS014024 | **MF120612** | ND | ND | ND |
|  | GWS014025 | **MF120762** | ND | ND | ND |
|  | GWS030165 | **MF120763** | ND | ND | ND |
|  | GWS030228 | **MF120738** | ND | ND | ND |
|  | GWS032382 | **MF120665** | ND | ND | ND |
|  | GWS032402 | **MF120689** | ND | ND | ND |
|  | GWS039103 | **MF120789** | ND | ND | ND |
|  | GWS039397 | **MF120728** | ND | ND | ND |
|  | GWS039419 | **MF120643** | ND | ND | ND |
|  | GWS040409 | **MF120706** | ND | ND | ND |
|  | GWS040412 | **MF120722** | ND | ND | ND |
|  | GWS040440 | **MF120756** | ND | ND | ND |
| *Leptosiphonia schousboei* (Thuret) Kylin | GenBank | KF671170 | ND | JX828133 | ND |
| *Lophurella periclados* (Sonder) F.Schmitz | GWS016008 | HM917986 | ND | KU564481 | **MF120816** |
| *Melanothamnus afaqhusainii* M.Shameel | GWS014134 | KU564334 | ND | KU564460 | **MF120806** |
| *Melanothamnus bajacali* (Hollenberg) Díaz-Tapia & Maggs | GenBank | ND | ND | HM573572 | ND |
| *Melanothamnus collabens* (C.Agardh) Díaz-Tapia & Maggs | GenBank | ND | ND | JX828157 | ND |
| *Melanothamnus decumbens* (Segi) Díaz-Tapia & Maggs | GenBank | ND | ND | DQ787477 | ND |
| *Melanothamnus ferulaceus* (Suhr ex J. Agardh) Díaz-Tapia & Maggs | GenBank | HM573511 | ND | HM573584 | ND |
| *Melanothamnus flavimarinus (*M.S.Kim & I.K.Lee) Díaz-Tapia & Maggs | GenBank | KJ960854 | ND | DQ787481 | ND |
| *Melanothamnus harveyi* (Bailey) Díaz-Tapia & Maggs | GWS005627 | HM918764 | ND | ND | ND |
| GWS005798 | KM894010 | ND | ND | ND |
| GWS005799 | HM918782 | ND | ND | ND |
|  | GWS006020 | HM916710 | ND | ND | ND |
|  | GWS006034 | HM916711 | ND | ND | ND |
|  | GWS006222 | HM916727 | ND | ND | ND |
|  | GWS006247 | HM916732 | ND | ND | ND |
|  | GWS006260 | KM894035 | ND | ND | ND |
|  | GWS006261 | HM916733 | ND | ND | ND |
|  | GWS006262 | ND | ND | **MF120859** | ND |
|  | GWS006264 | HM916734 | ND | ND | ND |
|  | GWS006265 | HQ919550 | ND | ND | ND |
|  | GWS007774 | HM916945 | ND | ND | ND |
|  | GWS007778 | HM916946 | ND | KM894068 | ND |
|  | GWS007779 | HM916947 | ND | ND | ND |
|  | GWS007781 | HM916948 | ND | ND | ND |
|  | GWS007782 | HM916949 | ND | ND | ND |
|  | GWS007783 | HM916950 | ND | ND | ND |
|  | GWS007968 | HM916975 | ND | ND | ND |
|  | GWS007976 | HM916979 | ND | ND | ND |
|  | GWS008000 | HM916983 | ND | ND | ND |
|  | GWS008774 | HM916544 | ND | ND | ND |
|  | GWS008775 | HM916552 | ND | ND | ND |
|  | GWS008794 | HM916566 | ND | ND | ND |
|  | GWS010963 | HM916526 | ND | KM894076 | **MF120829** |
|  | GWS012474 | HQ919477 | ND | ND | ND |
|  | GWS012475 | HQ919478 | ND | KM894062 | ND |
|  | GWS012476 | HQ919479 | ND | ND | ND |
|  | GWS012477 | HQ919480 | ND | ND | ND |
|  | GWS012478 | HQ919481 | ND | ND | ND |
|  | GWS012479 | HQ919482 | ND | ND | ND |
|  | GWS012480 | HQ919483 | ND | ND | ND |
|  | GWS013918 | HQ919252 | ND | ND | ND |
|  | GWS014713 | KM894007 | ND | ND | ND |
|  | GWS014729 | KM894060 | ND | ND | ND |
|  | GWS017872 | HM915111 | ND | ND | ND |
|  | GWS024016 | **MF120686** | ND | ND | ND |
|  | GWS024026 | KM894036 | ND | ND | ND |
|  | GWS024027 | KM894057 | ND | ND | ND |
|  | GWS024030 | KM894049 | ND | ND | ND |
|  | GWS024065 | KM894055 | ND | ND | ND |
|  | GWS024066 | KM894037 | ND | ND | ND |
|  | GWS024067 | KM894003 | ND | ND | ND |
|  | GWS024069 | KM893999 | ND | ND | ND |
|  | GWS027800 | KM894040 | ND | ND | ND |
|  | GWS027845 | KM894001 | ND | ND | ND |
|  | GWS027846 | KM894032 | ND | ND | ND |
|  | GWS030050 | KM894000 | ND | ND | ND |
|  | GWS030051 | KM894020 | ND | ND | ND |
|  | GWS030054 | KM894058 | ND | ND | ND |
|  | GWS030060 | KM894013 | ND | KM894066 | ND |
|  | GWS030064 | KM894056 | ND | ND | ND |
|  | GWS030065 | KM894031 | ND | KM894070 | ND |
|  | GWS030067 | KM894011 | ND | ND | ND |
|  | GWS030068 | KM894051 | ND | ND | ND |
|  | GWS030069 | KM894018 | ND | ND | ND |
|  | GWS030122 | KM894059 | ND | ND | ND |
|  | GWS030124 | KM894025 | ND | KM894069 | ND |
|  | GWS030125 | KM894015 | ND | ND | ND |
|  | GWS030126 | KM894002 | ND | ND | ND |
|  | GWS030127 | KM894016 | ND | ND | ND |
|  | GWS030131 | KM894006 | ND | ND | ND |
|  | GWS030154 | KM894052 | ND | ND | ND |
|  | GWS030155 | KM894008 | ND | ND | ND |
|  | GWS030157 | KM894038 | ND | ND | ND |
|  | GWS031207 | **MF120736** | ND | ND | ND |
|  | GWS031216 | **MF120702** | ND | ND | ND |
|  | GWS031223 | **MF120740** | ND | ND | ND |
|  | GWS031224 | **MF120650** | ND | ND | ND |
|  | GWS031553 | KM894044 | ND | KM894073 | ND |
|  | GWS031554 | KM893998 | ND | ND | ND |
|  | GWS031557 | KM894005 | ND | ND | ND |
|  | GWS032033 | KM894041 | ND | ND | ND |
|  | GWS032037 | KM894026 | ND | ND | ND |
|  | GWS032038 | KM894061 | ND | ND | ND |
|  | GWS032074 | KM894021 | ND | ND | ND |
|  | GWS032076 | KM894053 | ND | ND | ND |
|  | GWS032077 | KM894034 | ND | ND | ND |
|  | GWS032080 | KM894054 | ND | ND | ND |
|  | GWS032081 | KM894023 | ND | ND | ND |
|  | GWS032141 | KM894043 | ND | ND | ND |
|  | GWS032143 | KM894045 | ND | ND | ND |
|  | GWS032148 | KM894029 | ND | ND | ND |
|  | GWS032150 | KM894050 | ND | ND | ND |
|  | GWS032152 | KM893997 | ND | ND | ND |
|  | GWS032164 | ND | **MF120892** | ND | ND |
|  | GWS032179 | KM894030 | ND | ND | ND |
|  | GWS032184 | KM894027 | ND | ND | ND |
|  | GWS032185 | KM894017 | ND | ND | ND |
|  | GWS032186 | KM894014 | ND | ND | ND |
|  | GWS034790 | KM894047 | ND | ND | ND |
|  | GWS039650 | **MF120726** | ND | ND | ND |
|  | GWS039651 | **MF120733** | ND | ND | ND |
|  | GWS039725 | **MF120788** | ND | ND | ND |
| *Melanothamnus* sp._21GWS | GWS003033 | HM918545 | ND | KM894064 | ND |
| *Melanothamnus tongatensis* (Harvey ex Kützing) Díaz-Tapia & Maggs | GenBank | ND | ND | HM573570 | ND |
| *Melanothamnus yendoi* (Segi) Díaz-Tapia & Maggs | GenBank | ND | ND | DQ787495 | ND |
| *Neorhodomela aculeata* (L.P.Perestenko) Masuda | GWS028686 | KU564391 | ND | KU564498 | **MF120822** |
| *Odonthalia dentata* (Linnaeus) Lyngbye | GWS008808 | HM918820 | ND | KU564463 | **KY572842** |
| *Polyostea arctica* (J.Agardh) Savoie & G.W.Saunders | GWS007126 | HM916874 | ND | KU564478 | **MF120815** |
| *Polyostea bipinnata* (Postels & Ruprecht) Ruprecht | KAM0009 | ND | ND | KU564490 | ND |
| *Polyostea hamata* (E.S.Sinova) Savoie & G.W.Saunders | GWS008375 | HM916546 | ND | ND | **MF120810** |
| GWS027925 | ND | ND | KU564512 | ND |
| *Polyostea robusta* (N.L.Gardner) Savoie & G.W.Saunders | GWS022431 | HQ545318 | ND | KU564466 | **MF120809** |
| *Polysiphonia akkeshiensis* Segi | GWS002931 | KM894022 | ND | ND | ND |
| GWS003116 | HM918550 | ND | ND | ND |
| GWS004313 | HM918646 | ND | KM894065 | ND |
|  | GWS009069 | HM916535 | ND | KM894067 | ND |
|  | GWS010305 | HM916557 | ND | KM894074 | ND |
|  | GWS012519 | HM915286 | ND | ND | ND |
|  | GWS030063 | KM894012 | ND | ND | ND |
| *Polysiphonia atlantica* Kapraun & J.N.Norris (North Carolina) | GenBank | ND | ND | EU492910 | ND |
| *Polysiphonia atlantica* Kapraun & J.N. Norris (Spain) | GenBank | ND | ND | JX828141 | ND |
| *Polysiphonia binneyi* Harvey | GenBank | ND | ND | HM573555 | ND |
| *Polysiphonia determinata* (Hollenberg) Savoie & G.W.Saunders | GWS003128 | ND | **MF120903** | ND | ND |
| GWS004014 | **HM918625** | ND | ND | ND |
| GWS004015 | **HM918626** | ND | **MF120879** | ND |
|  | GWS005172 | ND | **MF120838** | ND | ND |
|  | GWS013001 | **HM915514** | ND | ND | ND |
|  | GWS021754 | **KM254600** | ND | ND | ND |
|  | GWS021825 | **KM254229** | ND | **MF120832** | ND |
|  | GWS021830 | **KM254347** | ND | ND | ND |
|  | GWS021838 | **KM254625** | ND | ND | ND |
|  | GWS030584 | **MF120621** | ND | ND | ND |
|  | GWS036012 | **MF120682** | ND | ND | ND |
| *Polysiphonia dokdoensis* Bustamante, B.Y.Won & T.O.Cho | GenBank | ND | ND | KJ407268 | ND |
| *Polysiphonia freshwateri* Bustamante, B.Y.Won & T.O.Cho | GenBank | ND | ND | KJ778612 | ND |
| *Polysiphonia havanensis* senus Boergesen | GenBank | ND | ND | HM573554 | ND |
| *Polysiphonia homoia* Setchell & N.L.Gardner | GenBank | ND | ND | HM573553 | ND |
| *Polysiphonia kapraunii* Stuercke & Freshwater | GWS013757 | **MF120714** | ND | **MF120869** | ND |
| *Polysiphonia koreana* Bustamante, B.Y.Won & T.O.Cho | GenBank | ND | ND | KJ957811 | ND |
| *Polysiphonia macrocarpa* (C.Agardh) Sprengel | GenBank | ND | ND | HM573545 | ND |
| *Polysiphonia morrowii* Harvey | GWS008179 | **HQ919566** | ND | **MF120896** | ND |
| GWS012867 | HQ919519 | ND | KU564505 | ND |
|  | GWS013420 | **HM915693** | ND | ND | ND |
|  | GWS013422 | ND | **MF120871** | ND | ND |
|  | GWS019916 | **MF120685** | ND | ND | ND |
|  | GWS019932 | **MF120709** | ND | ND | ND |
|  | GWS019952 | **MF120669** | ND | ND | ND |
|  | GWS021067 | **MF120766** | ND | ND | ND |
|  | GWS034862 | **MF120704** | ND | ND | ND |
| *Polysiphonia pacifica* var. *disticha* Hollenberg | GWS021393 | **HQ544059** | ND | **MF120864** | ND |
| *Polysiphonia pacifica* Hollenberg var. *pacifica* | GWS002975 | **MF120701** | ND | ND | ND |
| GWS003019 | **MF120651** | ND | ND | ND |
| GWS004881 | ND | **MF120895** | ND | ND |
|  | GWS006555 | HM916790 | ND | KU564485 | **MF120817** |
|  | GWS006556 | **HM916791** | ND | **MF120858** | ND |
|  | GWS006559 | **MF120641** | ND | ND | ND |
|  | GWS008735 | **MF120780** | ND | ND | ND |
|  | GWS008736 | **MF120752** | ND | ND | ND |
|  | GWS009098 | **HM916528** | ND | ND | ND |
|  | GWS009643 | **MF120771** | ND | ND | ND |
|  | GWS010248 | **HM916548** | ND | ND | ND |
|  | GWS012587 | **HM915296** | ND | ND | ND |
|  | GWS012588 | **MF120775** | ND | ND | ND |
|  | GWS014312 | **MF120791** | ND | ND | ND |
|  | GWS019419 | **MF120668** | ND | ND | ND |
|  | GWS019476 | **MF120672** | ND | ND | ND |
|  | GWS019487 | **MF120688** | ND | ND | ND |
|  | GWS022117 | **HQ544197** | ND | ND | ND |
|  | GWS022157 | **HQ544206** | ND | ND | ND |
|  | GWS027970 | ND | **MF120861** | ND | ND |
|  | GWS028203 | **MF120741** | ND | ND | ND |
|  | GWS028298 | ND | **MF120889** | ND | ND |
|  | GWS028337 | ND | **MF120844** | ND | ND |
|  | GWS028547 | **MF120656** | ND | ND | ND |
|  | GWS030666 | ND | **MF120898** | ND | ND |
|  | GWS030690 | ND | **MF120891** | ND | ND |
|  | GWS030766 | ND | **MF120878** | ND | ND |
|  | GWS036859 | **MF120772** | ND | ND | ND |
|  | GWS038599 | **MF120673** | ND | ND | ND |
| *Polysiphonia* sp._1*pacifica* | GWS006522 | **HM916786** | ND | **MF120843** | ND |
|  | GWS006607 | **KM254891** | ND | ND | ND |
|  | GWS006654 | **HM916815** | ND | **MF120865** | ND |
|  | GWS009959 | **HM916562** | ND | ND | ND |
|  | GWS019291 | ND | **MF120839** | ND | ND |
|  | GWS020321 | ND | **MF120840** | ND | ND |
|  | GWS021134 | ND | **MF120833** | ND | ND |
|  | GWS021480 | **KM254375** | ND | ND | ND |
|  | GWS021850 | **KM254395** | ND | ND | ND |
|  | GWS021856 | **HQ919287** | ND | ND | ND |
|  | GWS027981 | ND | **MF120888** | ND | ND |
|  | GWS030412 | ND | **MF120901** | ND | ND |
|  | GWS031470 | **MF120628** | ND | ND | ND |
|  | GWS035025 | **MF120794** | ND | ND | ND |
|  | GWS035751 | **MF120803** | ND | ND | ND |
|  | GWS038605 | **MF120638** | ND | ND | ND |
|  | GWS038901 | **MF120793** | ND | ND | ND |
| *Polysiphonia* sp._2*pacifica* | GWS008580 | **MF120597** | ND | **MF120831** | ND |
|  | GWS027037 | **MF120620** | ND | **MF120842** | ND |
| *Polysiphonia paniculata* Montagne | GenBank | ND | ND | AY396041 | ND |
| *Polysiphonia polyspora* (C.Agardh) Montagne | GenBank | ND | ND | JX828147 | ND |
| *Polysiphonia scopulorum* Harvey(Spain) | GenBank | ND | ND | JX828149 | ND |
| *Polysiphonia scopulorum* var. *villum* (J.Agardh) Hollenberg (North Carolina) | GenBank | ND | ND | EU492915 | ND |
| *Polysiphonia scopulorum var. villum* (J.Agardh) Hollenberg (British Columbia) | GWS002902 | **HM918528** | ND | ND | ND |
| GWS004788 | **HM918699** | ND | ND | ND |
| GWS006329 | **HM916746** | ND | **MF120852** | ND |
| GWS006336 | **HM916753** | ND | **MF120834** | **MF120804** |
|  | GWS008217 | **HM917000** | ND | ND | ND |
|  | GWS008218 | **HM917001** | ND | ND | ND |
|  | GWS008278 | **HM916554** | ND | ND | ND |
|  | GWS009051 | **HM916560** | ND | ND | ND |
|  | GWS019608 | **HQ544523** | ND | ND | ND |
|  | GWS019672 | **HQ544569** | ND | ND | ND |
|  | GWS020743 | **HQ545054** | ND | ND | ND |
|  | GWS020755 | **HQ545062** | ND | ND | ND |
|  | GWS022212 | **KM254519** | ND | ND | ND |
|  | GWS022224 | **KM254911** | ND | ND | ND |
|  | GWS022244 | **HQ544219** | ND | ND | ND |
|  | GWS022266 | **KM254964** | ND | ND | ND |
|  | GWS022301 | **KM254832** | ND | ND | ND |
|  | GWS022390 | **KM254236** | ND | ND | ND |
|  | GWS028437 | **MF120785** | ND | ND | ND |
|  | GWS034876 | **MF120768** | ND | ND | ND |
|  | GWS036020 | **MF120627** | ND | ND | ND |
| *Polysiphonia* sp._1*paniculata* | GWS002705 | **MF120729** | ND | ND | ND |
| GWS002921 | **MF120679** | ND | ND | ND |
|  | GWS003136 | **HM918551** | ND | ND | ND |
|  | GWS004032 | **MF120743** | ND | ND | ND |
|  | GWS004738 | **MF120715** | ND | ND | ND |
|  | GWS006824 | **HM916837** | ND | ND | ND |
|  | GWS006827 | **HM916840** | ND | ND | ND |
|  | GWS006836 | **HM916845** | ND | ND | ND |
|  | GWS008127 | **MF120626** | ND | ND | ND |
|  | GWS008201 | **HM916996** | ND | ND | ND |
|  | GWS008438 | **HM916561** | ND | **MF120867** | ND |
|  | GWS008965 | **HM916529** | ND | ND | ND |
|  | GWS008991 | **HM916517** | ND | ND | ND |
|  | GWS009009 | **HM916565** | ND | ND | ND |
|  | GWS010472 | **HM916520** | ND | ND | ND |
|  | GWS010534 | **HM916556** | ND | ND | ND |
|  | GWS010593 | **HM916514** | ND | ND | ND |
|  | GWS012522 | **HM915288** | ND | ND | ND |
|  | GWS012639 | **HQ919513** | ND | ND | ND |
|  | GWS012997 | **MF120796** | ND | ND | ND |
|  | GWS013316 | **HM915556** | ND | ND | ND |
|  | GWS013421 | **MF120779** | ND | ND | ND |
|  | GWS013553 | **HM916386** | ND | ND | ND |
|  | GWS013663 | **HM916320** | ND | **MF120897** | ND |
|  | GWS014408 | **MF120710** | ND | ND | ND |
|  | GWS014475 | **MF120755** | ND | ND | ND |
|  | GWS019411 | **HQ544378** | ND | ND | ND |
|  | GWS019975 | **MF120727** | ND | ND | ND |
|  | GWS020620 | **MF120799** | ND | ND | ND |
|  | GWS020635 | **MF120801** | ND | ND | ND |
|  | GWS022433 | **MF120735** | ND | ND | ND |
|  | GWS022434 | **HQ545320** | ND | ND | ND |
|  | GWS027399 | **MF120653** | ND | ND | ND |
|  | GWS027536 | **MF120713** | ND | ND | ND |
|  | GWS027538 | **MF120645** | ND | ND | ND |
|  | GWS027552 | **MF120687** | ND | ND | ND |
|  | GWS028078 | **MF120753** | ND | ND | ND |
|  | GWS028425 | ND | **MF120868** | ND | ND |
|  | GWS030945 | **MF120683** | ND | ND | ND |
|  | GWS031402 | **MF120633** | ND | ND | ND |
|  | GWS038627 | **MF120773** | ND | ND | ND |
| *Polysiphonia* sp._2*paniculata* | GWS002983 | **HQ919603** | ND | ND | ND |
| GWS003026 | **HM918540** | ND | ND | ND |
| GWS004587 | **MF120676** | ND | ND | ND |
|  | GWS006386 | **HM916763** | ND | **MF120873** | **MF120821** |
|  | GWS006610 | **HM916803** | ND | **MF120874** | ND |
|  | GWS008276 | **HM916540** | ND | ND | ND |
|  | GWS019264 | **HQ544292** | ND | ND | ND |
|  | GWS021293 | **KM254505** | ND | ND | ND |
|  | GWS021488 | **KM254763** | ND | ND | ND |
|  | GWS021489 | **HQ544066** | ND | ND | ND |
|  | GWS021991 | **HQ544175** | ND | ND | ND |
|  | GWS022002 | **KM254991** | ND | ND | ND |
|  | GWS022316 | **HQ544237** | ND | ND | ND |
|  | GWS027311 | **MF120703** | ND | ND | ND |
| *Polysiphonia* sp._23GWS | GWS017992 | **HM915153** | ND | ND | ND |
|  | GWS018035 | **HM915166** | ND | **MF120841** | **MF120805** |
|  | GWS031556 | **MF120666** | ND | ND | ND |
|  | GWS040626 | **MF409431** | ND | ND | ND |
|  | GWS040627 | **MF409423** | ND | ND | ND |
|  | GWS040681 | **MF409426** | ND | ND | ND |
|  | GWS040703 | **MF409424** | ND | ND | ND |
|  | GWS040797 | **MF409432** | ND | ND | ND |
|  | GWS040896 | **MF409428** | ND | ND | ND |
| *Polysiphonia stricta* (Dillwyn) Greville | GWS002518 | **HM918482** | ND | ND | ND |
| GWS003662 | **HM918600** | ND | ND | ND |
|  | GWS003726 | **KY572456** | ND | ND | ND |
|  | GWS003885 | **HM918613** | ND | ND | ND |
|  | GWS007394 | **HM916906** | ND | ND | ND |
|  | GWS009768 | **KY572814** | ND | ND | ND |
|  | GWS009770 | **KY572649** | ND | ND | ND |
|  | GWS009771 | **HM916534** | ND | ND | ND |
|  | GWS013735 | **HQ545350** | ND | ND | ND |
|  | GWS013990 | **KY572204** | ND | ND | ND |
|  | GWS013991 | **KY572151** | ND | ND | ND |
|  | GWS014767 | **HM915064** | ND | ND | ND |
|  | GWS014768 | **HM915065** | ND | ND | ND |
|  | GWS014770 | **HM915066** | ND | ND | ND |
|  | GWS017899 | HM915116 | ND | KU564468 | ND |
|  | GWS018014 | **HM915161** | ND | ND | ND |
|  | GWS018112 | **HM915192** | ND | **MF120886** | ND |
|  | GWS027817 | **KY572552** | ND | ND | ND |
|  | GWS027818 | **KY572369** | ND | ND | ND |
|  | GWS027834 | **KY572262** | ND | ND | ND |
|  | GWS031511 | **KY572227** | ND | ND | ND |
|  | GWS039891 | **KY572414** | ND | ND | ND |
|  | GWS039936 | **KY572534** | ND | ND | ND |
|  | GWS039968 | **KY572470** | ND | ND | ND |
|  | GWS040033 | **KY572734** | ND | ND | ND |
|  | GWS040082 | **KY572539** | ND | ND | ND |
|  | GWS040907 | **KY572179** | ND | ND | ND |
| *Polysiphonia* sp._1*stricta* | GWS003611 | **MF120647** | ND | ND | ND |
|  | GWS003620 | **HQ919606** | ND | ND | ND |
|  | GWS003829 | **MF120684** | ND | ND | ND |
|  | GWS005271 | **HM918749** | ND | ND | ND |
|  | GWS005284 | **JX571973** | ND | ND | ND |
|  | GWS005293 | **HM918750** | ND | ND | ND |
|  | GWS005713 | **HM918770** | ND | ND | ND |
|  | GWS006176 | **HM916723** | ND | ND | ND |
|  | GWS007124 | **HQ919557** | ND | ND | ND |
|  | GWS007223 | **HM916889** | ND | ND | ND |
|  | GWS007403 | **HQ919561** | ND | ND | ND |
|  | GWS007606 | **HQ545369** | ND | ND | ND |
|  | GWS007615 | **HQ545370** | ND | ND | ND |
|  | GWS009861 | **HM916527** | ND | ND | ND |
|  | GWS010969 | **MF120800** | ND | ND | ND |
|  | GWS010974 | **MF120787** | ND | ND | ND |
|  | GWS012446 | **HQ919457** | ND | ND | ND |
|  | GWS012518 | **MF120691** | ND | ND | ND |
|  | GWS013740 | **MF120745** | ND | ND | ND |
|  | GWS013944 | **HQ919624** | ND | ND | ND |
|  | GWS013984 | ND | **MF120850** | ND | ND |
|  | GWS014782 | **HM915072** | ND | ND | ND |
|  | GWS018046 | **HM915172** | ND | ND | ND |
|  | GWS018086 | **HM915184** | ND | **MF120890** | **MF120826** |
|  | GWS018087 | **HM915185** | ND | **MF120853** | ND |
|  | GWS018140 | **HM915201** | ND | ND | ND |
|  | GWS018145 | **MF120774** | ND | ND | ND |
|  | GWS019735 | **MF120707** | ND | ND | ND |
|  | GWS027579 | ND | **MF120883** | ND | ND |
|  | GWS027840 | **MF120776** | ND | ND | ND |
|  | GWS029914 | **MF120795** | ND | ND | ND |
|  | GWS031514 | **MF120750** | ND | ND | ND |
|  | GWS039422 | **MF120661** | ND | ND | ND |
|  | GWS039423 | **MF120725** | ND | ND | ND |
|  | GWS039424 | **MF120717** | ND | ND | ND |
|  | GWS039432 | **MF120596** | ND | ND | ND |
|  | GWS039454 | **MF120631** | ND | ND | ND |
|  | GWS039456 | **MF120603** | ND | ND | ND |
| *Polysiphonia* sp._3*stricta* | GWS002657 | **HM918494** | ND | ND | ND |
|  | GWS003744 | **HM918604** | ND | ND | ND |
|  | GWS005199 | **HM918747** | ND | ND | ND |
|  | GWS005285 | **HQ919612** | ND | ND | ND |
|  | GWS005320 | ND | **MF120881** | ND | ND |
|  | GWS005716 | **HQ919613** | ND | ND | ND |
|  | GWS005913 | **HM918788** | ND | ND | ND |
|  | GWS006045 | **HM916714** | ND | ND | ND |
|  | GWS006976 | **HM916854** | ND | ND | ND |
|  | GWS007093 | **HM916865** | ND | ND | ND |
|  | GWS007098 | **HM916866** | ND | ND | ND |
|  | GWS007241 | **MF120640** | ND | ND | ND |
|  | GWS014759 | **HM915059** | ND | ND | ND |
|  | GWS017861 | **HM915107** | ND | **MF120876** | ND |
|  | GWS017862 | **HM915108** | ND | **MF120847** | ND |
|  | GWS027816 | **MF120731** | ND | ND | ND |
|  | GWS027860 | **MF120604** | ND | ND | ND |
|  | GWS027871 | **MF120748** | ND | ND | ND |
|  | GWS027879 | **MF120622** | ND | ND | ND |
|  | GWS030180 | **MF120619** | ND | ND | ND |
|  | GWS032112 | **MF120721** | ND | ND | ND |
|  | GWS032370 | ND | **MF120900** | ND | ND |
|  | GWS034083 | **MF120608** | ND | ND | ND |
|  | GWS039394 | **MF120652** | ND | ND | ND |
|  | GWS039436 | **MF120609** | ND | ND | ND |
|  | GWS039442 | **MF120670** | ND | ND | ND |
|  | GWS039444 | **MF120696** | ND | ND | ND |
|  | GWS039446 | **MF120778** | ND | ND | ND |
|  | GWS039461 | **MF120711** | ND | ND | ND |
|  | GWS040436 | **MF120758** | ND | ND | ND |
|  | GWS040453 | **MF120600** | ND | ND | ND |
| *Polysiphonia subtilissima* Montagne | GenBank | ND | ND | JX294917 | ND |
| *Polysiphonia ulleungensis* Bustamante, B.Y.Won & T.O.Cho | GenBank | ND | ND | KJ028026 | ND |
| *Pterosiphonia cloiophylla* (C.Agardh) Falkenberg | GWS036383 | KU564408 | ND | KU564504 | ND |
| *Rhodomela confervoides* (Hudson) P.C.Silva | GWS018104 | HM915190 | ND | KU564515 | **KY572844** |
| *Rhodomela lycopodioides* (Linnaeus) C.Agardh | GWS009336 | HM916516 | ND | KU564489 | **MF120820** |
| *Streblocladia camptoclada* (Montagne) Falkenberg | GWS036399 | **MF120765** | ND | **MF120884** | ND |
| *Streblocladia glomerulata* (Montagne) Papenfuss | GenBank | ND | ND | KX499569 | ND |
| *Symphyocladia plumosa* Savoie & G.W.Saunders | GWS014494 | KU564352 | ND | KU564473 | **MF120814** |
| *Symphyocladia marchantioides* (Harvey) Falkenberg | GenBank | ND | ND | GU731229 | ND |
| *Tayloriella tenebrosa* (Harvey) Kylin | GWS036374 | KU564354 | ND | KU564474 | ND |
| *Veleroa adunca* (J.Agardh) Womersley & Parsons | GWS015067 | **MF120782** | ND | **MF120887** | **MF120825** |
| *Vertebrata aterrima* (J.D.Hooker & Harvey) Kuntze | GenBank | ND | ND | GU385831 | ND |
| *Vertebrata byssoides* (Goodenough & Woodward) Kuntze | GenBank | KJ960354 | ND | DQ787584 | ND |
| *Vertebrata constricta* (Womersley) Díaz-Tapia & Maggs | GenBank | ND | ND | GU385832 | ND |
| *Vertebrata ericoides* (Harvey) Kuntze | GWS016590 | **MF120664** | ND | **MF120855** | **MF120812** |
| *Vertebrata foetidissima* (Cocks ex Bornet) Díaz-Tapia & Maggs | GenBank | ND | ND | JQ653292 | ND |
| *Vertebrata fruticulosa* (Wulfen) Kuntze | GenBank | KC238313 | ND | JX828161 | ND |
| *Vertebrata hendryi* (N.L.Gardner) Savoie & G.W.Saunders | GWS002753 | **MF120770** | ND | ND | ND |
| GWS002854 | **MF120618** | ND | ND | ND |
| GWS002855 | **MF120734** | ND | ND | ND |
|  | GWS002920 | **HM918529** | ND | ND | ND |
|  | GWS002994 | **MF120720** | ND | ND | ND |
|  | GWS003031 | **HM918543** | ND | ND | ND |
|  | GWS003370 | **MF120754** | ND | ND | ND |
|  | GWS003917 | **MF120724** | ND | ND | ND |
|  | GWS004065 | ND | **MF120894** | ND | ND |
|  | GWS004980 | **HM918725** | ND | ND | ND |
|  | GWS005038 | **HM918729** | ND | ND | ND |
|  | GWS006439 | **HM916771** | ND | **MF120854** | ND |
|  | GWS006441 | **HM916772** | ND | **MF120848** | **MF120808** |
|  | GWS006618 | **HM916806** | ND | ND | ND |
|  | GWS006773 | **HQ919555** | ND | ND | ND |
|  | GWS006821 | **HM916834** | ND | ND | ND |
|  | GWS006832 | **HM916843** | ND | ND | ND |
|  | GWS008240 | **HM917008** | ND | ND | ND |
|  | GWS008254 | **HM917009** | ND | ND | ND |
|  | GWS008340 | **HM916525** | ND | ND | ND |
|  | GWS008364 | **HM916539** | ND | ND | ND |
|  | GWS009068 | **HM916543** | ND | ND | ND |
|  | GWS009511 | **HM916564** | ND | ND | ND |
|  | GWS012521 | **HM915287** | ND | ND | ND |
|  | GWS012763 | **MF120747** | ND | ND | ND |
|  | GWS013002 | **HM915522** | ND | ND | ND |
|  | GWS013101 | **HM915483** | ND | ND | ND |
|  | GWS014304 | **MF120615** | ND | ND | ND |
|  | GWS019288 | **HQ919306** | ND | ND | ND |
|  | GWS019733 | **HQ919332** | ND | ND | ND |
|  | GWS019923 | **MF120658** | ND | ND | ND |
|  | GWS019962 | **HQ919341** | ND | ND | ND |
|  | GWS020064 | **MF120599** | ND | ND | ND |
|  | GWS020070 | **HQ919346** | ND | ND | ND |
|  | GWS020359 | **HQ544879** | ND | ND | ND |
|  | GWS021834 | **KM254503** | ND | ND | ND |
|  | GWS022439 | **MF120605** | ND | ND | ND |
|  | GWS022447 | **HQ919452** | ND | ND | ND |
|  | GWS027493 | **MF120698** | ND | ND | ND |
|  | GWS027507 | **MF120751** | ND | ND | ND |
|  | GWS027521 | **MF120648** | ND | ND | ND |
|  | GWS028272 | ND | **MF120899** | ND | ND |
|  | GWS030321 | **MF120695** | ND | ND | ND |
|  | GWS030358 | **MF120677** | ND | ND | ND |
|  | GWS030381 | **MF120611** | ND | ND | ND |
|  | GWS030388 | **MF120792** | ND | ND | ND |
|  | GWS030442 | **MF120759** | ND | ND | ND |
|  | GWS031343 | **MF120784** | ND | ND | ND |
|  | GWS035301 | **MF120657** | ND | ND | ND |
|  | GWS035964 | **MF120781** | ND | ND | ND |
|  | GWS036011 | **MF120602** | ND | ND | ND |
|  | GWS038572 | **MF120642** | ND | ND | ND |
|  | GWS038576 | **MF120757** | ND | ND | ND |
|  | GWS038580 | **MF120769** | ND | ND | ND |
|  | GWS038623 | **MF120732** | ND | ND | ND |
|  | GWS039049 | **MF120674** | ND | ND | ND |
| *Vertebrata isogona* (Harvey) Díaz-Tapia & Maggs | GenBank | ND | ND | HM573578 | ND |
| *Vertebrata lanosa* (Linnaeus) T.A.Christensen | GWS000001 | **MF120649** | ND | ND | ND |
| GWS002679 | **HM918500** | ND | ND | ND |
|  | GWS003570 | **MF120697** | ND | ND | ND |
|  | GWS003631 | **HM918594** | ND | ND | ND |
|  | GWS003842 | **HM918607** | ND | ND | ND |
|  | GWS005661 | **MF120630** | ND | ND | ND |
|  | GWS006055 | **HM916715** | ND | ND | ND |
|  | GWS007177 | **MF120760** | ND | ND | ND |
|  | GWS007871 | **HM916963** | ND | ND | ND |
|  | GWS014765 | **MF120655** | ND | **MF120849** | ND |
|  | GWS014795 | HM915077 | ND | KU564487 | **MF120818** |
| *Vertebrata nigra* (Hudson) Díaz-Tapia & Maggs | GWS014621 | **MF120694** | ND | ND | ND |
| GWS014710 | **HM919015** | ND | **MF120893** | **MF120828** |
| GWS017938 | **HM915134** | ND | ND | ND |
|  | GWS018047 | **HM915173** | ND | **MF120846** | ND |
|  | GWS027839 | **MF120761** | ND | ND | ND |
|  | GWS030031 | **MF120798** | ND | ND | ND |
|  | GWS030032 | **MF120624** | ND | ND | ND |
|  | GWS030033 | **MF120635** | ND | ND | ND |
|  | GWS030153 | **MF120749** | ND | ND | ND |
|  | GWS030227 | **MF120662** | ND | ND | ND |
| *Vertebrata* sp._1*fucoides* | GWS003512 | **HM918578** | ND | ND | ND |
|  | GWS003608 | **HM918591** | ND | ND | ND |
|  | GWS003616 | **HM918593** | ND | ND | ND |
|  | GWS005626 | **HM918763** | ND | ND | ND |
|  | GWS007048 | **HM916862** | ND | ND | ND |
|  | GWS007158 | **HM916879** | ND | ND | ND |
|  | GWS007216 | **HM916887** | ND | ND | ND |
|  | GWS007243 | **HM916892** | ND | ND | ND |
|  | GWS007248 | **HM916893** | ND | ND | ND |
|  | GWS007283 | **HM916896** | ND | ND | ND |
|  | GWS007296 | **HQ919559** | ND | ND | ND |
|  | GWS007345 | **HM916903** | ND | ND | ND |
|  | GWS007434 | **HM916913** | ND | ND | ND |
|  | GWS007455 | **HM891380** | ND | ND | ND |
|  | GWS007456 | **HM916918** | ND | ND | ND |
|  | GWS007489 | **HM916923** | ND | ND | ND |
|  | GWS007537 | **HM916933** | ND | ND | ND |
|  | GWS007600 | **HQ545365** | ND | ND | ND |
|  | GWS007797 | **HM916953** | ND | ND | ND |
|  | GWS007924 | **HM916971** | ND | ND | ND |
|  | GWS007946 | **HM916972** | ND | ND | ND |
|  | GWS007955 | **HM916974** | ND | ND | ND |
|  | GWS007994 | **HM916982** | ND | ND | ND |
|  | GWS008773 | **HM916536** | ND | ND | ND |
|  | GWS009879 | **HM916558** | ND | ND | ND |
|  | GWS009881 | **HM916563** | ND | ND | ND |
|  | GWS011667 | **HM916513** | ND | ND | ND |
|  | GWS011809 | **HM917382** | ND | ND | ND |
|  | GWS011837 | **HQ919545** | ND | ND | ND |
|  | GWS011863 | **MF120654** | ND | ND | ND |
|  | GWS011868 | **HM915245** | ND | ND | ND |
|  | GWS013989 | **MF120764** | ND | ND | ND |
|  | GWS014761 | **HM915060** | ND | ND | ND |
|  | GWS017840 | **HM915098** | ND | ND | ND |
|  | GWS017858 | **HM915106** | ND | ND | ND |
|  | GWS017927 | **HM915126** | ND | ND | ND |
|  | GWS017960 | **HQ919245** | ND | ND | ND |
|  | GWS017997 | **HM915155** | ND | ND | ND |
|  | GWS017998 | **HM915156** | ND | ND | ND |
|  | GWS018012 | **HM915159** | ND | ND | ND |
|  | GWS018013 | **HM915160** | ND | ND | ND |
|  | GWS018028 | **HM915164** | ND | ND | ND |
|  | GWS018115 | **HM915193** | ND | ND | ND |
|  | GWS018125 | **HM915197** | ND | ND | ND |
|  | GWS018146 | **HM915205** | ND | **MF120880** | ND |
|  | GWS018147 | **HM915206** | ND | **MF120851** | ND |
|  | GWS024019 | **MF120678** | ND | ND | ND |
|  | GWS030036 | **MF120639** | ND | ND | ND |
|  | GWS030120 | **MF120625** | ND | ND | ND |
|  | GWS030129 | **MF120663** | ND | ND | ND |
|  | GWS030163 | **MF120739** | ND | ND | ND |
|  | GWS032073 | **MF120719** | ND | ND | ND |
|  | GWS032093 | **MF120712** | ND | ND | ND |
|  | GWS032094 | **MF120644** | ND | ND | ND |
|  | GWS032103 | **MF120777** | ND | ND | ND |
| *Vertebrata* sp._2*fucoides* | GWS005912 | **MF120786** | ND | ND | ND |
| GWS005985 | **HM918796** | ND | ND | ND |
|  | GWS005986 | **HM918797** | ND | ND | ND |
|  | GWS005989 | **HM918800** | ND | ND | ND |
|  | GWS006088 | **HM916720** | ND | ND | ND |
|  | GWS006096 | **HM916721** | ND | ND | ND |
|  | GWS014709 | **HM919014** | ND | ND | ND |
|  | GWS014711 | **HM919016** | ND | ND | ND |
|  | GWS014720 | **HM919023** | ND | ND | ND |
|  | GWS017850 | **HM915104** | ND | **MF120882** | ND |
|  | GWS017939 | **HM915135** | ND | **MF120836** | ND |
|  | GWS017994 | **HM915154** | ND | ND | ND |
|  | GWS027801 | **MF120692** | ND | ND | ND |
|  | GWS027823 | **MF120675** | ND | ND | ND |
|  | GWS027824 | **MF120797** | ND | ND | ND |
|  | GWS027832 | **MF120595** | ND | ND | ND |
|  | GWS027861 | **MF120634** | ND | ND | ND |
|  | GWS032106 | **MF120700** | ND | ND | ND |
|  | GWS032362 | **MF120723** | ND | ND | ND |
|  | GWS034076 | **MF120716** | ND | ND | ND |
|  | GWS034082 | **MF120601** | ND | ND | ND |
|  | GWS034797 | **MF120737** | ND | ND | ND |
|  | GWS038082 | **MF409417** | ND | ND | ND |
| *Vertebrata stimpsonii* (Harvey) Kuntze | GenBank | ND | ND | JX828126 | ND |
| *Vertebrata thuyoides* (Harvey) Kuntze | GWS026296 | **MF120637** | ND | **MF120845** | **MF120807** |
| *Vertebrata woodii* (Harvey) Kuntze | GWS008685 | **HM916511** | ND | **MF120857** | **MF120813** |
| GWS022311 | **KM254748** | ND | ND | ND |
| GWS022313 | HQ544236 | ND | KU564507 | ND |
|  | GWS022318 | **KM254839** | ND | ND | ND |
|  | GWS027452 | **MF120616** | ND | ND | ND |
|  | GWS027949 | **MF120767** | ND | ND | ND |
|  | GWS028032 | **MF120607** | ND | ND | ND |
|  | GWS028649 | **MF120646** | ND | ND | ND |
|  | GWS035981 | **MF120693** | ND | ND | ND |
|  | GWS036042 | **MF120671** | ND | ND | ND |
|  | GWS038601 | **MF120632** | ND | ND | ND |
|  | GWS039000 | **MF120636** | ND | ND | ND |
|  |  |  |  |  |  |

*a*GenBank indicates that sequence data were downloaded from GenBank and we do not have a voucher for that specimen.

*b*ND = not determined, indicates that data were not determined for that gene and that specimen.
